# Supplementary material for: Stable mixed group II (Ca, Sr) and XIV (Ge, Sn) lead-free perovskite solar cells
Source: Royal Society of Chemistry journal article supplement (doi:10.1039/c8ta01490f), 2018-01-01
Supplement: c8ta01490f1.pdf [file c8ta01490f1.pdf]

## Supplementary Materials

### Stable Mixed Group II (Ca, Sr) and XIV (Ge, Sn) Lead-free Perovskite Solar Cells

Roshan Ali<sup>1</sup>, Guo-Jiao Hou<sup>1</sup>, Zhen-Gang Zhu<sup>1,2,5,\*</sup>, Qing-Bo Yan<sup>3,2</sup>, Qing-Rong Zheng<sup>2</sup>, and Gang Su<sup>2,4,5†</sup>

<sup>1</sup>*School of Electronic, Electrical and Communication Engineering,  
University of Chinese Academy of Sciences, Beijing 100049, China.*

<sup>2</sup>*Theoretical Condensed Matter Physics and Computational Materials Physics Laboratory,  
College of Physical Sciences, University of Chinese Academy of Sciences, Beijing 100049, China.*

<sup>3</sup>*College of Materials Science and Opto-Electronic Technology,  
University of Chinese Academy of Sciences, Beijing 100049, China.*

<sup>4</sup>*Kavli Institute for Theoretical Sciences, University of Chinese Academy of Sciences, Beijing 100190, China.*

<sup>5</sup>*CAS Center for Excellence in Topological Quantum Computation,  
University of Chinese Academy of Sciences, Beijing 100190, China.*

PACS numbers: 72.15.Qm,73.63.Kv,73.63.-b

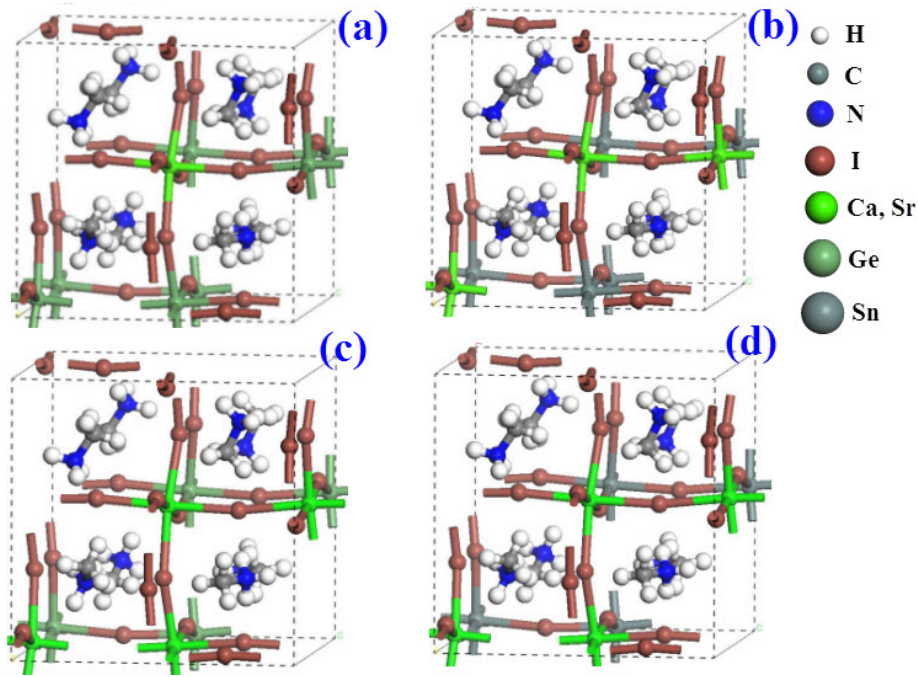

FIG. S1. The crystal structure for  $\text{MACa}_{0.125}\text{Ge}_{0.875}\text{I}_3$  (a),  $\text{MACa}_{0.375}\text{Sn}_{0.625}\text{I}_3$  (b),  $\text{MASr}_{0.5}\text{Ge}_{0.5}\text{I}_3$  (c), and  $\text{MASr}_{0.5}\text{Sn}_{0.5}\text{I}_3$  (d).

| Material                                         | $a/\text{\AA}$ | $b/\text{\AA}$ | $c/\text{\AA}$ | Volume ( $\text{\AA}^3$ ) | $\alpha^\circ$ | $\beta^\circ$ | $\gamma^\circ$ |
|--------------------------------------------------|----------------|----------------|----------------|---------------------------|----------------|---------------|----------------|
| $\text{MAPbI}_3$                                 | 12.70          | 12.70          | 12.95          | 2088.7                    | 90.0           | 89.0          | 90.0           |
| $\text{MACa}_{0.125}\text{Ge}_{0.875}\text{I}_3$ | 12.17          | 12.26          | 12.38          | 1845.7                    | 90.3           | 89.1          | 89.9           |
| $\text{MACa}_{0.375}\text{Ge}_{0.625}\text{I}_3$ | 12.25          | 12.29          | 12.40          | 1868.2                    | 90.1           | 89.2          | 90.0           |
| $\text{MACa}_{0.5}\text{Ge}_{0.5}\text{I}_3$     | 12.29          | 12.35          | 12.44          | 1889.3                    | 90.0           | 89.2          | 90.0           |
| $\text{MACa}_{0.125}\text{Sn}_{0.875}\text{I}_3$ | 12.62          | 12.58          | 12.76          | 2026.3                    | 89.9           | 89.2          | 89.9           |
| $\text{MACa}_{0.375}\text{Sn}_{0.625}\text{I}_3$ | 12.56          | 12.52          | 12.74          | 2005.0                    | 89.9           | 89.1          | 90.1           |
| $\text{MACa}_{0.5}\text{Sn}_{0.5}\text{I}_3$     | 12.53          | 12.50          | 12.73          | 1993.8                    | 89.9           | 89.2          | 90.1           |
| $\text{MASr}_{0.125}\text{Ge}_{0.875}\text{I}_3$ | 12.59          | 12.50          | 12.65          | 1990.7                    | 89.8           | 88.8          | 89.4           |
| $\text{MASr}_{0.375}\text{Ge}_{0.625}\text{I}_3$ | 12.40          | 12.42          | 12.62          | 1943.7                    | 89.7           | 89.1          | 90.2           |
| $\text{MASr}_{0.5}\text{Ge}_{0.5}\text{I}_3$     | 12.48          | 12.54          | 12.71          | 1988.2                    | 89.8           | 89.2          | 90.2           |
| $\text{MASr}_{0.125}\text{Sn}_{0.875}\text{I}_3$ | 12.70          | 12.65          | 12.82          | 2060.1                    | 90.0           | 89.1          | 89.9           |
| $\text{MASr}_{0.375}\text{Sn}_{0.625}\text{I}_3$ | 12.74          | 12.68          | 12.94          | 2089.6                    | 90.0           | 89.1          | 90.2           |
| $\text{MASr}_{0.5}\text{Sn}_{0.5}\text{I}_3$     | 12.77          | 12.72          | 12.96          | 2104.2                    | 89.9           | 89.1          | 89.9           |

TABLE S1. Lattice constants ( $a$ ,  $b$ ,  $c$ ), lattice volume ( $\text{\AA}^3$ ), and lattice angles ( $\alpha$ ,  $\beta$ ,  $\gamma$ ) are presented here for our mixed b-site perovskite materials, after successful relaxation of the structure in a comparison to  $\text{MAPbI}_3$ .

**Remarks on PDOS.-** We divided the PDOS (Fig. S6) plot into three main parts (MA, (Ca,Sr)/(Ge,Sn), and I). It is clear that the lowest unoccupied molecular orbital (LUMO) is dominated by Sn-p (or Ge-p) orbitals; while the highest occupied molecular orbital (HOMO) is dominated by I-p orbitals. At LUMO there is no contribution at VB and CB, but large contribution (Ca-d, Sr-d states) after Sn-p (or Ge-p) orbitals at CB. We did not find any effective influence of the MA cation in the electronic properties, but could expect some influence on octahedral tilting and bond lengths. Furthermore we expect that in our mixed cations study (Ca/(Sn,Ge), Sr/(Sn,Ge)) the oxidation of Ge and Sn from oxidation state  $2^+$  to  $4^+$  will decrease due to the chemical interaction of these mixed cations with each

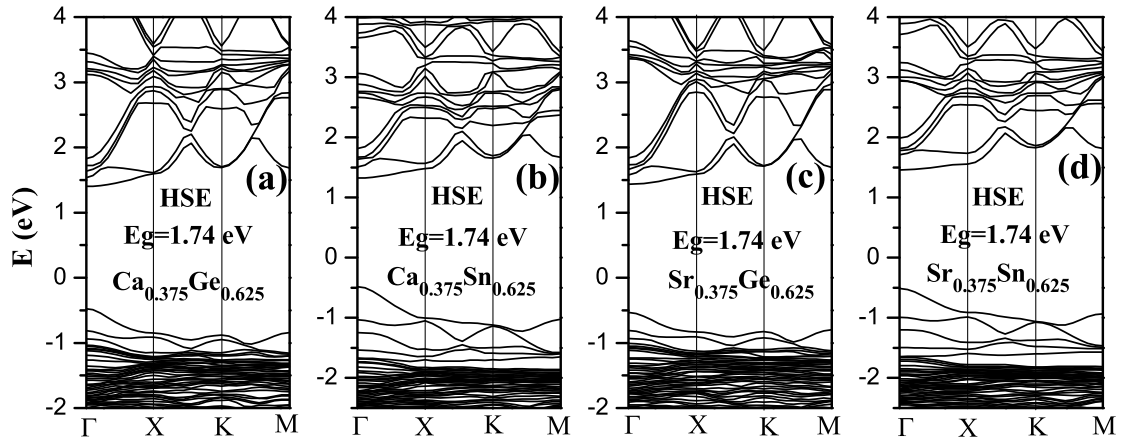

FIG. S2. HSE06-Bandgap values for  $\text{MACa}_{0.375}\text{Ge}_{0.625}\text{I}_3$  (a),  $\text{MACa}_{0.375}\text{Sn}_{0.625}\text{I}_3$  (b),  $\text{MASr}_{0.375}\text{Ge}_{0.625}\text{I}_3$  (c), and  $\text{MASr}_{0.375}\text{Sn}_{0.625}\text{I}_3$  (d).

other.

\* zgzhu@ucas.ac.cn

† gsu@ucas.ac.cn

<sup>1</sup> K. Wang, Z. Liang, X. Wang, X. Cui, Adv. electron. Mater., 2015, **1**, 1500089.

<sup>2</sup> P. Umari, E. Mosconi and F. De Angelis, Sci. Rep., 2014, **4**, 4467.

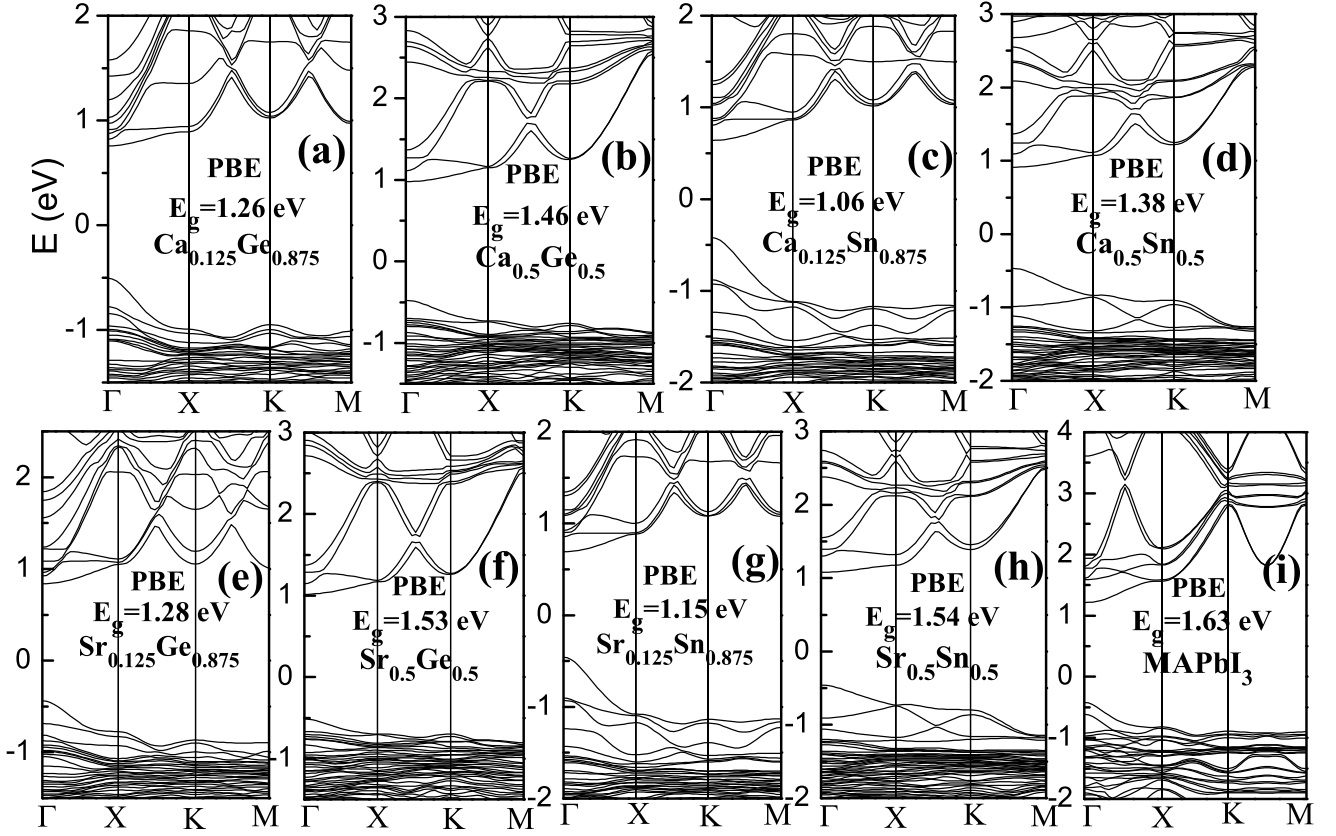

FIG. S3. Band structures for our explored mixed Pb-free perovskite materials with PBE calculations for  $\text{MACa}_{0.125}\text{Ge}_{0.875}\text{I}_3$  (a),  $\text{MACa}_{0.5}\text{Ge}_{0.5}\text{I}_3$  (b),  $\text{MACa}_{0.125}\text{Sn}_{0.875}\text{I}_3$  (c),  $\text{MACa}_{0.5}\text{Sn}_{0.5}\text{I}_3$  (d),  $\text{MASr}_{0.125}\text{Ge}_{0.875}\text{I}_3$  (e),  $\text{MASr}_{0.5}\text{Ge}_{0.5}\text{I}_3$  (f),  $\text{MASr}_{0.125}\text{Sn}_{0.875}\text{I}_3$  (g),  $\text{MASr}_{0.5}\text{Sn}_{0.5}\text{I}_3$  (h), in a comparison to PBE  $\text{MAPbI}_3$  (i).

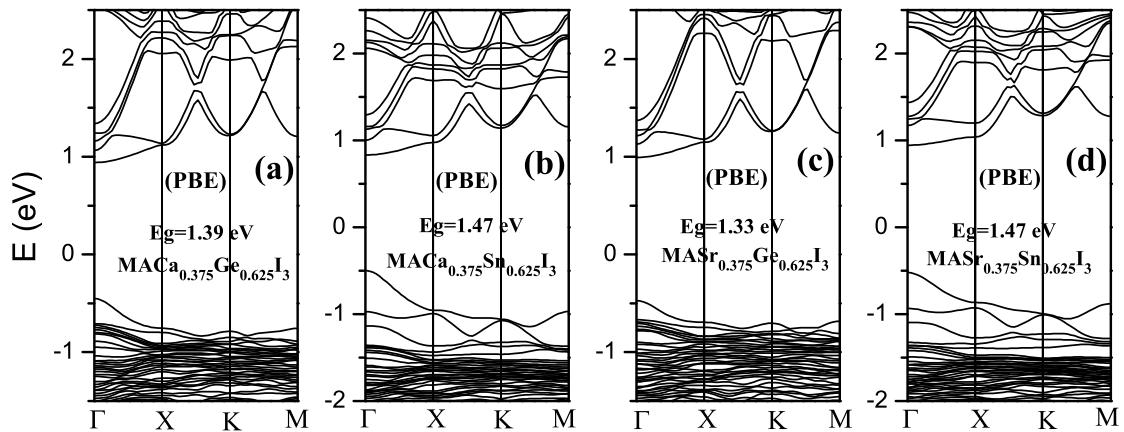

FIG. S4. PBE-structure for  $\text{MACa}_{0.375}\text{Ge}_{0.625}\text{I}_3$  (a),  $\text{MACa}_{0.375}\text{Sn}_{0.625}\text{I}_3$  (b),  $\text{MASr}_{0.375}\text{Ge}_{0.625}\text{I}_3$  (c), and  $\text{MASr}_{0.375}\text{Sn}_{0.625}\text{I}_3$  (d)..

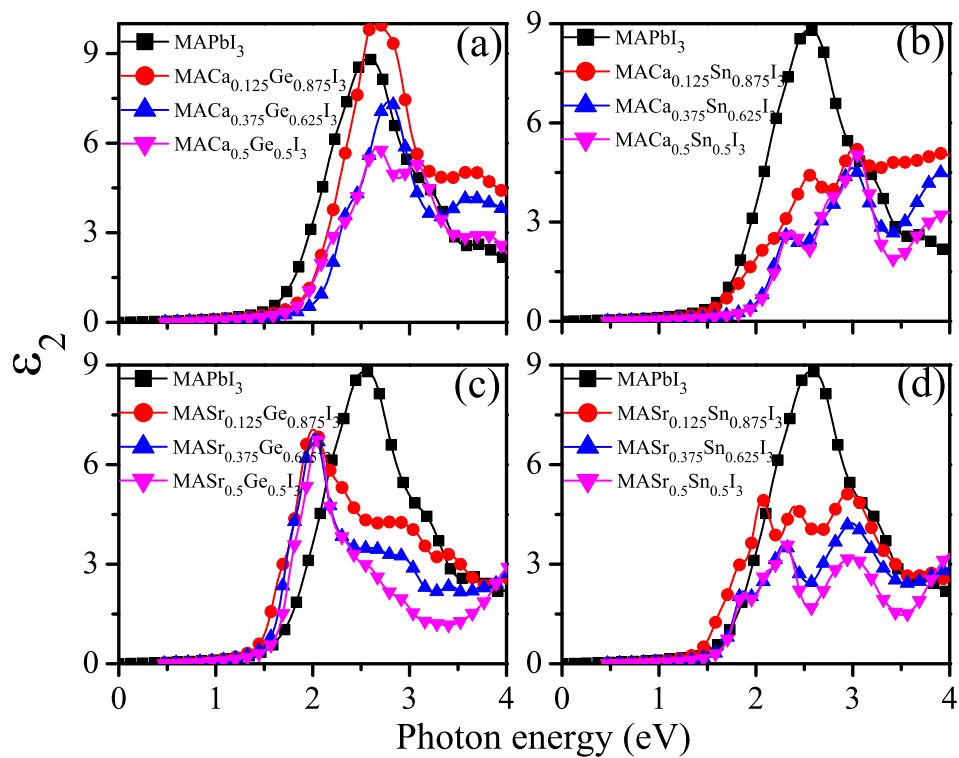

FIG. S5. Imaginary part of dielectric function ( $\epsilon_2$ ) is calculated for  $\text{MA}(\text{Ca}/\text{Ge})\text{I}_3$  in (a),  $\text{MA}(\text{Ca}/\text{Sn})\text{I}_3$  in (b),  $\text{MA}(\text{Sr}/\text{Ge})\text{I}_3$  in (c) and  $\text{MA}(\text{Sr}/\text{Sn})\text{I}_3$  in (d)..

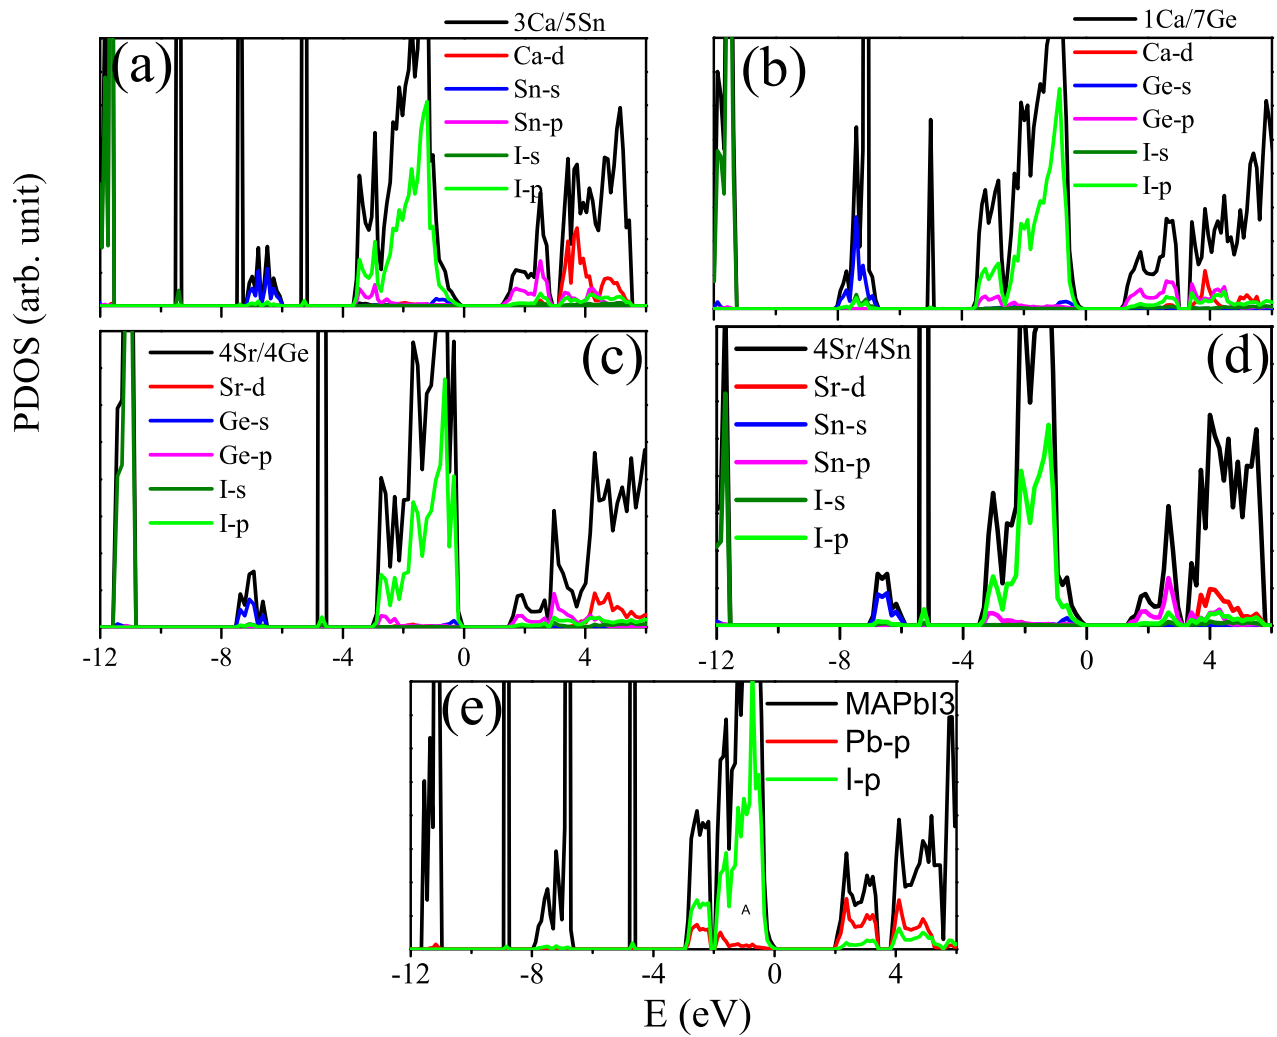

FIG. S6. PDOS plots for selected  $\text{MACa}_{0.375}\text{Sn}_{0.625}\text{I}_3$  (a),  $\text{MACa}_{0.125}\text{Ge}_{0.875}\text{I}_3$  (b),  $\text{MASr}_{0.5}\text{Ge}_{0.5}\text{I}_3$  (c), and  $\text{MASr}_{0.5}\text{Sn}_{0.5}\text{I}_3$  (d), mixed perovskite materials in a comparison to  $\text{MAPbI}_3$  (e) with PBE calculations.
